# Supplementary material for: Outcomes following SARS-CoV-2 infection in patients with primary and secondary immunodeficiency in the UK
Source: Oxford University Press journal article supplement (doi:10.1093/cei/uxac008), 2022-01-28
Supplement: uxac008_suppl_supplementary_tables.docx [file uxac008_suppl_supplementary_tables.docx]

**Supplementary Tables**

| Parameter | Survived (n=76) | Died (n=17) | OR (95% CI) | p |
| --- | --- | --- | --- | --- |
| Age (yrs) | 41.0 (29.0-54.5) | 63.0 (52.3-74.0) |  | 0.0003 |
| Sex (n,% Female) | 46 (49.5) | 7 (41.2) | 0.46 (0.17-1.28) | 0.1452 |
| Pre SARS-CoV-2 infection lymphocyte count (x109/L) | 1.40 (1.03-1.70) | 0.80 (0.40-1.35) |  | 0.0025 |
| Body mass index (kg/m2) | 27.4 (23.9-30.8) | 24.2 (16.4-27.4) |  | 0.0722 |
| Immunoglobulin replacement (n, %) | 65 (85.5) | 16 (94.1) | 2.71 (0.39-30.88) | 0.3395 |
| Prophylactic antibiotics (n, %) | 39 (51.3) | 14 (82.4) | 4.43 (1.28-15.22) | 0.0195 |
| Current immunosuppression (n, %) | 16 (21.1) | 2 (11.8) | 0.50 (0.11-2.37) | 0.3809 |
| Chronic lung disease (n, %)   - Bronchiectasis - Granulomatous interstitial lung disease | 38 (50.0)  20 (26.3)  11 (14.5) | 14 (82.4)  8 (47.1)  2 (11.8) | 4.67 (1.35-16.04)  2.49 (0.78-7.45)  0.79 (0.16-3.47) | 0.0151  0.0919  0.7709 |
| Cardiovascular disease (n, %) | 8 (10.5) | 5 (29.4) | 3.54 (1.06-12.21) | 0.0424 |
| Rheumatological disease (n, %) | 4 (5.3) | 1 (5.8) | 1.13 (0.09-7.71) | 0.9185 |
| Chronic liver disease (n, %) | 12 (15.8) | 5 (29.4) | 2.22 (0.72-7.75) | 0.1890 |
| Diabetes mellitus (n, %) | 3 (4.0) | 3 (18.7) | 5.21 (1.10-23.55) | 0.0377 |
| Chronic renal disease (n, %) | 3 (4.0) | 2 (11.8) | 3.24 (0.53-16.73) | 0.1964 |
| Autoimmune cytopaenia (n, %) | 18 (23.7) | 5 (29.4) | 1.34 (0.47-4.17) | 0.6207 |
| Chronic gastrointestinal disease (n, %) | 8 (10.5) | 5 (29.4) | 3.54 (1.06-12.21) | 0.0424 |
| Haematological malignancy (n, %) | 4 (5.3) | 1 (5.9) | 1.13 (0.09-7.71) | 0.9185 |
| Splenomegaly (n, %) | 10 (13.2) | 2 (11.8) | 0.88 (0.18-4.01) | 0.8769 |
| Organ specific autoimmunity (n, %) | 6 (7.9) | 3 (17.7) | 2.50 (0.61-9.58) | 0.2189 |

**Supplementary Table S1: Univariate analysis of risk factors associated with mortality in individuals with a CVID phenotype.** 93 individuals were included, 87 with genetically undifferentiated CVID and 6 with monogenic CVID-like disease. Median and interquartile ranges are provided for continuous variables. Differences between the distributions evaluated using 2-tailed Mann-Whitney U test. Differences between categorical variables, evaluated using 2-tailed Fisher exact test with ORs calculated using the Baptista-Pike method.

| Variable | Odds ratio | 95% confidence interval | Z | P value |
| --- | --- | --- | --- | --- |
| Age | 0.96 | 0.90 to 1.02 | 1.43 | 0.15 |
| Male Sex | 0.52 | 0.05 to 4.14 | 0.61 | 0.54 |
| Pre SARS-CoV-2 infection lymphocyte count | 9.99 | 1.56 to 114 | 2.15 | 0.03 |
| Immunoglobulin replacement | 2.45 | 0.19 to 70.4 | 0.64 | 0.52 |
| Prophylactic antibiotics | 25.4 | 2.47 to 711 | 2.39 | 0.02 |
| Immune suppression | 0.22 | 0.01 to 2.58 | 1.15 | 0.25 |
| Bronchiectasis | 1.65 | 0.16 to 16.8 | 0.43 | 0.67 |
| GL-ILD | 0.08 | 0.00 to 2.45 | 1.18 | 0.24 |
| Cardiovascular disease | 3.05 | 0.19 to 82.1 | 0.75 | 0.45 |
| Rheumatological disease | 2.95 | 0.01 to 202.0 | 0.47 | 0.64 |
| Chronic liver disease | 1.21 | 0.07 to 23.2 | 0.13 | 0.89 |
| Diabetes mellitus | 3.93 | 0.11 to 175 | 0.74 | 0.46 |
| Chronic kidney disease | 6.61 | 0.06 to 644 | 0.85 | 0.40 |
| Autoimmune cytopenias | 0.14 | 0.00 to 1.84 | 1.31 | 0.19 |
| Chronic gastrointestinal disease | 5.74 | 0.19 to 252 | 1.00 | 0.32 |
| Haematological malignancy | 0.11 | 0.00 to 4.95 | 0.97 | 0.33 |
| Splenomegaly | 1.44 | 0.03 to 57.3 | 0.20 | 0.84 |
| Other organ specific autoimmunity | 8.16 | 0.27 to 301 | 1.21 | 0.23 |

**Supplementary Table S2: Multivariate analysis of risk factors associated with mortality in CVID phenotype**

| Variable | Odds ratio | 95% confidence interval | Z | P value |
| --- | --- | --- | --- | --- |
| Age | 0.98 | 0.94 to 1.01 | 0.01 | 0.23 |
| Male Sex | 1.30 | 0.42 to 4.22 | 1.20 | 0.65 |
| Immunoglobulin replacement | 2.69 | 0.74 to 11.93 | 0.45 | 0.16 |
| Prophylactic antibiotics | 1.01 | 0.30 to 3.44 | 1.42 | 0.99 |
| Immune suppression | 2.18 | 0.67 to 7.35 | 0.01 | 0.20 |
| Chronic lung disease | 1.37 | 0.38 to 4.89 | 1.29 | 0.63 |
| Cardiovascular disease | 2.58 | 0.83 to 8.40 | 0.49 | 0.10 |
| Rheumatological disease | 0.79 | 0.14 to 4.48 | 1.63 | 0.79 |
| Chronic liver disease | 10.84 | 0.30 to 398.0 | 0.27 | 0.15 |
| Diabetes mellitus | 1.36 | 0.28 to 6.58 | 1.43 | 0.70 |
| Chronic kidney disease | 0.38 | 0.06 to 1.55 | 0.38 | 0.20 |
| Chronic gastrointestinal disease | 0.60 | 0.03 to 5.41 | 1.29 | 0.68 |
| Haematological malignancy | 0.59 | 0.12 to 3.07 | 0.41 | 0.52 |

**Supplementary Table S3: Multivariate analysis of risk factors associated with mortality in SID.**
